# Supplementary material for: Aromaticity of substituted fulvene derivatives: substituent-dependent ring currents
Source: Royal Society of Chemistry journal article supplement (doi:10.1039/c003686b), 2010-01-01
Supplement: c003686b.pdf [file c003686b.pdf]

## Supplementary Information:

### Aromaticity of substituted fulvene derivatives: substituent-dependent ring currents

T. M. Krygowski, W. P. Oziminski, M. Palusiak, P. W. Fowler and A.D. McKenzie

Table 1. HOMA and *p*EDA values for substituted pentafulvene derivatives sorted according to diminishing values of HOMA. These data were used to construct the plot in Figure 4 of the paper.

| Substituent                  | HOMA    | <i>p</i> EDA(5F) |
|------------------------------|---------|------------------|
| CH <sub>2</sub> <sup>-</sup> | 0.7427  | 0.69501          |
| NH <sup>-</sup>              | 0.7081  | 0.64108          |
| O <sup>-</sup>               | 0.6717  | 0.59841          |
| CC <sup>-</sup>              | 0.3696  | 0.33172          |
| NMe <sub>2</sub>             | 0.26    | 0.3084           |
| NH <sub>2</sub>              | 0.2521  | 0.27378          |
| COO <sup>-</sup>             | 0.1019  | 0.23063          |
| OCH <sub>3</sub>             | 0.0728  | 0.16465          |
| OH                           | 0.0391  | 0.15658          |
| F                            | -0.1169 | 0.08371          |
| Li                           | -0.1606 | 0.14143          |
| CHCH <sub>2</sub>            | -0.1617 | 0.04295          |
| CH <sub>3</sub>              | -0.1724 | 0.05946          |
| Cl                           | -0.1874 | 0.02053          |
| CCH                          | -0.1902 | -0.02188         |
| CMe <sub>3</sub>             | -0.2111 | 0.0511           |
| H                            | -0.2773 | 0                |
| CONH <sub>2</sub>            | -0.3145 | -0.0025          |
| SiMe <sub>3</sub>            | -0.3203 | -0.01181         |
| 2xCN                         | -0.3272 | -0.10442         |
| SiH <sub>3</sub>             | -0.3504 | -0.03628         |
| COCH <sub>3</sub>            | -0.3693 | -0.07098         |
| CHO                          | -0.3776 | -0.09948         |
| B(OH) <sub>2</sub>           | -0.3885 | -0.06803         |
| NO                           | -0.4029 | -0.16167         |
| CF <sub>3</sub>              | -0.4288 | -0.08787         |
| COOH                         | -0.4297 | -0.11451         |
| BH <sub>2</sub>              | -0.4614 | -0.15779         |
| NO <sub>2</sub>              | -0.4801 | -0.14994         |
| NH <sub>3</sub> <sup>+</sup> | -0.5104 | -0.18649         |
